# Supplementary material for: Nomogram Based on Clinicopathologic and US Characteristics: Axillary Nodal Evaluation Following Neoadjuvant Chemotherapy in Patients with Biopsy-Proven Node-Positive Breast Cancer
Source: Research Square preprint supplement (doi:10.21203/rs.3.rs-1699310/v1), 2022-06-01
Supplement: Supplementary file 1 [file 002cafeded865eba23f51060.docx]

Appendix A. Multivariate logistic regression analysis of clinicopathologic characteristics predicting axillary response to NAC in node-positive breast cancer patients (n=607)

| **Characteristics** | **OR** | **95%CI** | ***p-***value |
| --- | --- | --- | --- |
| **Age** | 1.02 | 1.00-1.05 | 0.063 |
| **Nodal stage** |  |  |  |
| 1 | - | - |  |
| 2 | 4.72 | 2.96-7.52 | <0.001 |
| 3 | 5.27 | 3.25-8.52 | <0.001 |
| **ER status** |  |  |  |
| Negative | - | - |  |
| Positive | 1.8 | 1.11-2.93 | 0.018 |
| **PR status** |  |  |  |
| Negative | - | - |  |
| Positive | 1.02 | 0.64-1.62 | 0.94 |
| **HER2 status** |  |  |  |
| Negative | - | - |  |
| Positive | 0.36 | 0.25-0.51 | <0.001 |
| **Ki-67** | 0.99 | 0.98-1.00 | 0.012 |

OR, odds ratio; CI, confidence interval; ER, estrogen receptor; PR, progesterone receptor; HER2, human epidermal growth factor receptor 2.

Appendix B. Multivariate logistic regression analysis of US characteristics predicting axillary response to NAC in node-positive breast cancer patients (n=607)

| **Characteristics** | **OR** | **95%CI** | ***p-*value** |
| --- | --- | --- | --- |
| **Location of breast tumor** |  |  |  |
| No residual disease on the lateral part of breast | - | - |  |
| Residual tumor on the lateral part of breast | 1.74 | 1.05-2.89 | 0.033 |
| **Number of primary tumor** |  |  |  |
| Solitary tumor | - | - |  |
| Multifocal disease | 1.04 | 0.61-1.77 | 0.889 |
| **Tumor diameter after NAC** | 1.04 | 0.98-1.07 | 0.06 |
| **Radiological response of breast tumor*** | 0.54 | 0.31-0.93 | 0.03 |
| **Long diameter** | 1.02 | 0.90-1.16 | 0.736 |
| **Short diameter** | 1.05 | 0.82-1.34 | 0.695 |
| **Ratio of long /short diameter** | 0.71 | 0.33-1.53 | 0.377 |
| **Cortical thickness** |  |  |  |
| ≤3mm | - | - |  |
| >3mm | 7.46 | 4.54-12.24 | <0.001 |
| **Shape** |  |  |  |
| Oval | - | - |  |
| Round | 1.74 | 1.11-2.73 | 0.017 |
| Irregular | 3.28 | 1.50-7.21 | 0.003 |
| **Margin** |  |  |  |
| Clear | - | - |  |
| Obscure | 7.18 | 0.79-65.07 | 0.088 |
| **Fatty hilum** |  |  |  |
| Presence | - | - |  |
| Absence | 1.41 | 0.78-2.56 | 0.259 |
| **Microcalcification** |  |  |  |
| Absence | - | - |  |
| Prsence | 1.56 | 0.45-5.34 | 0.481 |

OR, odds ratio; CI, confidence interval; NAC, neoadjuvant chemotherapy.

*Relative change in the largest diameter of primary tumor on US according to RECIST 1.1.

Appendix C **.** pCR and non-pCR rates of breast or axillary node after NAC (n=607)

| **Subtypes** |  | 1. **pCR(n=173)**   **no.(%)** | **B-non pCR(n=434)**  **no.(%)** | ***p*** |
| --- | --- | --- | --- | --- |
| **HR+ HER2-**  **(n=250)** | **N-pCR** | 13（56.5） | 62（27.3） | 0.004 |
| **N-non pCR** | 10（43.5） | 165（72.7） |  |
| **HR+ HER2+**  **(n=182)** | **N-pCR** | 65（95.6） | 46（40.4） | <0.001 |
| **N-non pCR** | 3（4.4） | 68（59.6） |  |
| **HR- HER2+**  **(n=98)** | **N-pCR** | 41（83.7） | 20（40.8） | <0.001 |
| **N-non pCR** | 8（16.3） | 29（59.2） |  |
| **HR- HER2-**  **(n=77)** | **N-pCR** | 30（90.9） | 25（56.8） | 0.001 |
| **N-non pCR** | 3（9.1） | 19（43.2） |  |

NAC, neoadjuvant chemotherapy; pCR, pathological complete response;

Appendix D **.** Predictive performance of the combined model in the different subtypes (n=607)

| **Subtypes** | **AUC** | **Sensitivity** | **Specificity** | **Youden index** |
| --- | --- | --- | --- | --- |
| **HR+ HER2-** | 0.79 | 57.14 | 92.00 | 0.49 |
| **HR+ HER2+** | 0.90 | 84.51 | 83.78 | 0.68 |
| **HR- HER2+** | 0.87 | 72.97 | 93.44 | 0.66 |
| **HR- HER2-** | 0.97 | 95.45 | 94.55 | 0.89 |

AUC, area under the receiver operating characteristic curve; HR, hormonal receptor; HER2, human epidermal growth factor receptor 2.
